# Supplementary material for: Fast, efficient and clean adsorption of bisphenol-A using renewable mesoporous silica nanoparticles from sugarcane waste ash
Source: Royal Society of Chemistry journal article supplement (doi:10.1039/d0ra05198e), 2020-01-01
Supplement: d0ra05198e1.pdf [file d0ra05198e1.pdf]

## **Supplementary Information**

### **Fast, Efficient and Clean Adsorption of Bisphenol-A Using Renewable Mesoporous Silica Nanoparticles from Sugarcane Waste Ash**

Suzimara Rovani<sup>\*a</sup>, Jonnatan J. Santos<sup>b</sup>, Sabine N. Guilhen<sup>a</sup>, Paola Corio<sup>b</sup> and Denise A. Fungaro<sup>a</sup>

<sup>a</sup> Instituto de Pesquisas Energéticas e Nucleares, IPEN-CNEN/SP - Av. Prof. Lineu Prestes, 2242 - Cidade Universitária - CEP 05508-000, São Paulo - SP - Brazil. \*E-mail: suzirovani@gmail.com

<sup>b</sup> Instituto de Química, Universidade de São Paulo - Av. Prof. Lineu Prestes, 748 - Cidade Universitária - P.O. Box 26077 - CEP 05508-000, São Paulo, SP, Brazil.

## Kinetic Adsorption Models

Kinetic adsorption models used in this publication were pseudo-first order<sup>1, 2</sup> (Eq. S1) and pseudo-second order<sup>3-5</sup> (Eq. S2).

$$q_t = q_e \cdot (1 - e^{(-k_1 t)}) \quad (\text{Eq. S1})$$

$$q_t = \frac{k_2 \cdot q_e^2 t}{1 + k_2 \cdot q_e \cdot t} \quad (\text{Eq. S2})$$

where in the Eq. S1,  $q_t$  is the amount of adsorbate adsorbed at time  $t$  ( $\text{mg g}^{-1}$ ),  $q_e$  is the equilibrium adsorption capacity ( $\text{mg g}^{-1}$ ),  $k_1$  is the pseudo-first-order rate constant ( $\text{h}^{-1}$ ), and  $t$  is the contact time (h). Eq. S2,  $k_2$  is the pseudo-second-order rate constant ( $\text{g mg}^{-1} \text{h}^{-1}$ ).<sup>6-8</sup>

## Validation of Adsorption Kinetics

Chi-square (Eq. S3) was used to validate the kinetics model.<sup>9</sup>

$$X^2 = \sum_{i=1}^n \frac{(q_{exp} - q_{cal})^2}{q_{cal}} \quad (\text{Eq. S3})$$

$q_{exp}$  and  $q_{cal}$  are experimentally determined quantity adsorbed at equilibrium and calculated quantity adsorbed at equilibrium respectively.

## Other Kinetic Adsorption Models

### Elovich model

The nonlinear form of the Elovich kinetic model is expressed by the Eq. S4.<sup>9</sup>

$$q_t = \beta \cdot \ln(\alpha \cdot \beta \cdot t) \quad (\text{Eq. S4})$$

$q_t$  is the quantity of adsorbate adsorbed at time  $t$  ( $\text{mg g}^{-1}$ ),  $\alpha$  is a constant related to chemisorption rate and  $\beta$  is a constant which depicts the extent of surface coverage.

### Fractional power kinetic model

The nonlinear form of the Fractional power kinetic model is expressed by the Eq. S5.<sup>9</sup>

$$q_t = K \cdot t^v \quad (\text{Eq. S5})$$

$q_t$  is the quantity of adsorbate adsorbed at time  $t$  ( $\text{mg g}^{-1}$ ),  $K$  is constant,  $v$  is constant that is usually less than unity if adsorption kinetic data fit well into the power function model.

### Equilibrium Adsorption Models

Equilibrium adsorption models utilized were Langmuir<sup>10</sup> (Eq. S6); Freundlich<sup>11</sup> (Eq. S7) and Liu<sup>8</sup> (Eq. S8).

$$q_e = \frac{Q_{max} \cdot K_L \cdot C_e}{1 + K_L \cdot C_e} \quad (\text{Eq. S6})$$

$q_e$  is the amount of adsorbate adsorbed at the equilibrium ( $\text{mg g}^{-1}$ ),  $C_e$  is the adsorbate concentration at the equilibrium, i.e.,  $C_e$  is the adsorbate concentration residual on solution ( $\text{mg L}^{-1}$ ),  $K_L$  is the Langmuir equilibrium constant ( $\text{L mg}^{-1}$ ), and  $Q_{max}$  is the maximum adsorption capacity of the adsorbent ( $\text{mg g}^{-1}$ ).<sup>8</sup>

$$q_e = K_F \cdot C_e^{\frac{1}{n_F}} \quad (\text{Eq. S7})$$

$K_F$  is the Freundlich equilibrium constant ( $\text{mg g}^{-1}(\text{mg L}^{-1})^{-1/n_F}$ ),  $n_F$  is the Freundlich exponent (dimensionless) and  $C_e$  is the adsorbate concentration residual on solution ( $\text{mg L}^{-1}$ ).<sup>8</sup>

$$q_e = \frac{Q_{max} \cdot (K_g \cdot C_e)^{n_L}}{1 + (K_g \cdot C_e)^{n_L}} \quad (\text{Eq. S8})$$

$K_g$  is the Liu equilibrium constant ( $L\ mg^{-1}$ );  $n_L$  is dimensionless exponent of the Liu equation;  $Q_{max}$  is the maximum adsorption capacity of the adsorbent ( $mg\ g^{-1}$ ),  $C_e$  is the adsorbate concentration residual on solution ( $mg\ L^{-1}$ ) and  $n_L$  could assume any positive value.<sup>8</sup>

TEM images

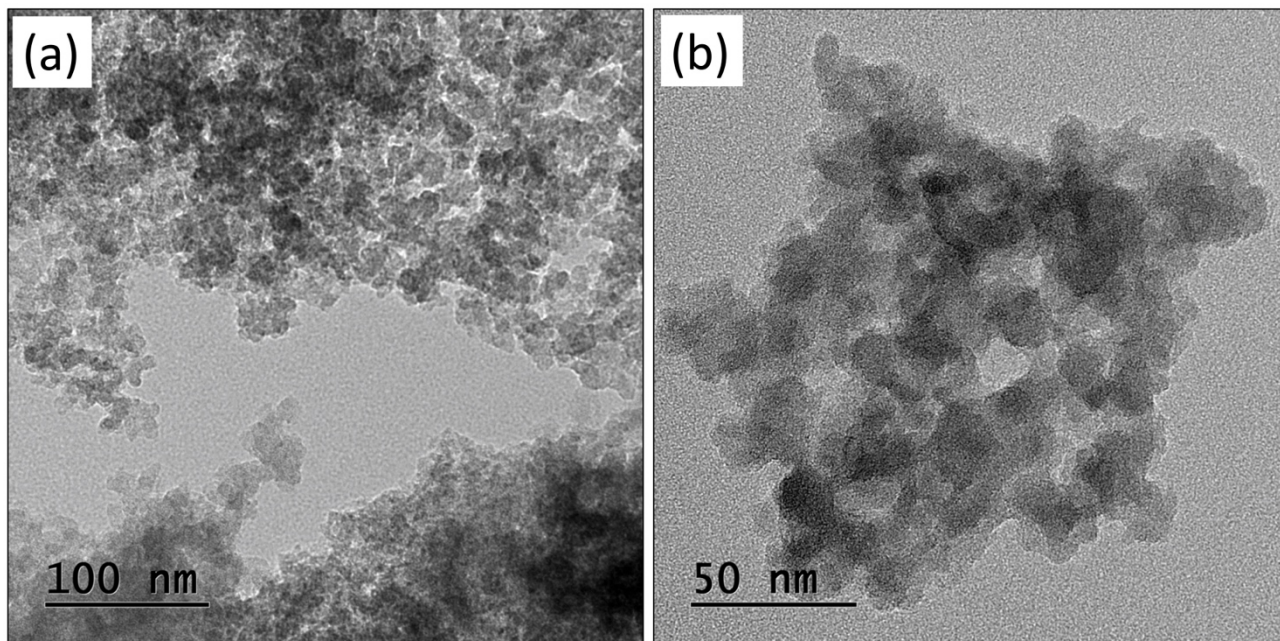

**Fig. S1** TEM images of mesoporous silica nanoparticles (MSN-CTAB) with two different magnifications.

## Study of the Effect of pH

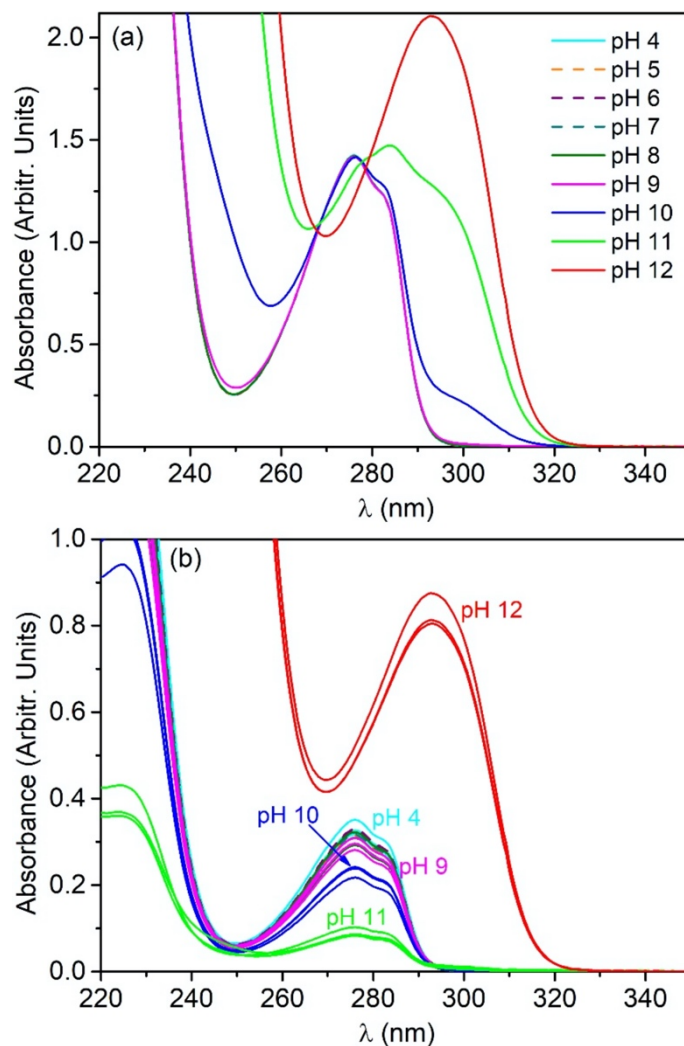

**Fig. S2** UV spectra before BPA adsorption (a) initial solution 100 mg L<sup>-1</sup> at different pH values from 4 to 12; and after 2h of BPA adsorption for 190 rpm at 25 °C (b) pH values from 4 to 12. Samples in triplicate.

In the bisphenol-A solutions at pH 10, 11, and 12 (Fig. S2a). The shift was due to a change in pH in which a higher pH resulted in deprotonation of the compounds which allowed increased conjugation. Conjugation lowers the energy of the bonds in the molecule resulting in a redshift of the  $\lambda_{\text{max}}$ . Therefore, the pH of the samples for UV-Vis analysis needed to be regulated to maintain the wavelength of maximum absorption for quantification.<sup>12</sup>

**Table S1.** Effect of the initial pH on the adsorption capacity of BPA. Conditions: 25 °C, initial concentration 100 mg L<sup>-1</sup>, contact time 2 h and adsorbent mass 1.0 g L<sup>-1</sup>.

| <b>Initial pH</b> | <b>Final pH</b> | <b>q experimental (mg g<sup>-1</sup>)</b> |
|-------------------|-----------------|-------------------------------------------|
| (4) 4.1           | 4.4             | 75.74 ± 0.8862                            |
| (5) 4.9           | 5.1             | 76.88 ± 1.103                             |
| (6) 5.9           | 5.4             | 75.98 ± 0.3586                            |
| (7) 7.0           | 5.6             | 78.46 ± 0.7024                            |
| (8) 8.0           | 5.4             | 77.93 ± 1.466                             |
| (9) 9.1           | 5.6             | 78.54 ± 0.1994                            |
| (10) 9.9          | 6.7             | 83.28 ± 0.4766                            |
| <b>(11) 10.9</b>  | <b>9.3</b>      | <b>91.98 ± 1.585</b>                      |
| (12) 11.9         | 11.6            | 59.26 ± 0.7943                            |

### BPA Calibration Curve

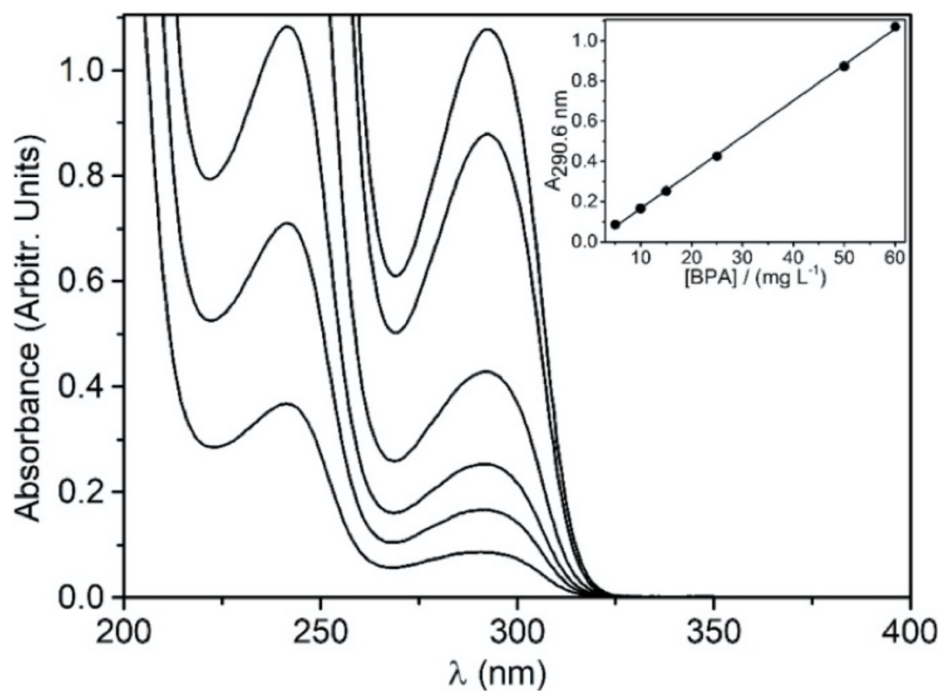

**Fig. S3** UV spectra of the BPA-containing solution at pH 11 at concentrations ranging from 5.00 to 60.0  $\text{mg L}^{-1}$ . Inserted graph: BPA analytical curve at pH 11.



## Kinetic Study

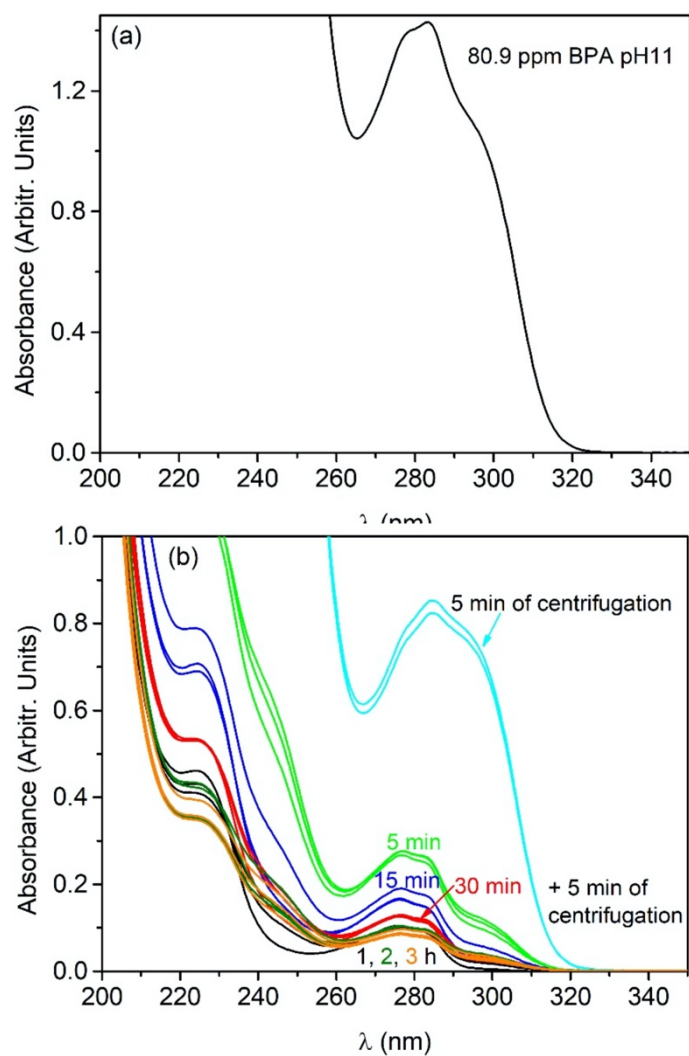

**Fig. S4** UV spectra before BPA adsorption (a) initial solution 80.9 mg L<sup>-1</sup> at pH 11; and after BPA adsorption at 25 °C (b) 5 min of centrifugation, 5 min to 3 h + 5 min of centrifugation. Samples in triplicate.

**Table S2.** Effect of the contact time on the adsorption capacity of BPA.

| <b>Time (minutes)</b>                 | <b>Initial pH</b> | <b>Final pH</b> | <b>q<sub>t</sub> experimental (mg g<sup>-1</sup>)</b> |
|---------------------------------------|-------------------|-----------------|-------------------------------------------------------|
| (5 min of centrifugation)             | 11                | 10.5            | 33.11 ± 1.149                                         |
| 5 + (5 min of centrifugation)         | 11                | 9.8             | 66.49 ± 0.4466                                        |
| 15 + (5 min of centrifugation)        | 11                | 9.9             | 72.10 ± 0.8751                                        |
| 30 + (5 min of centrifugation)        | 11                | 9.8             | 74.24 ± 0.2475                                        |
| <b>60 + (5 min of centrifugation)</b> | <b>11</b>         | <b>9.5</b>      | <b>75.59 ± 0.1170</b>                                 |
| 90 + (5 min of centrifugation)        | 11                | 9.9             | 75.20 ± 0.2636                                        |
| 120 + (5 min of centrifugation)       | 11                | 9.7             | 75.51 ± 0.4865                                        |
| 180 + (5 min of centrifugation)       | 11                | 9.7             | 75.86 ± 0.3614                                        |

**Table S3.** Kinetic parameters of BPA adsorption on MSN-CTAB.

| <b>Pseudo-first-order</b>                     | <b>Calculated</b>                 | <b>Experimental</b> |
|-----------------------------------------------|-----------------------------------|---------------------|
| $k_f$ (min <sup>-1</sup> )                    | 0.1506 ± 0.0172                   | -                   |
| $q_e$ (mg g <sup>-1</sup> )                   | 75.79 ± 1.696                     | 75.59 ± 0.1170      |
| $R^2_{ajd.}$                                  | 0.9784                            | -                   |
| $\chi^2$                                      | 0.000529                          | -                   |
| <b>Pseudo-second-order</b>                    | <b>Calculated</b>                 | <b>Experimental</b> |
| $k_s$ (g mg <sup>-1</sup> min <sup>-1</sup> ) | 3.006 × 10 <sup>-3</sup> ± 0.0196 | -                   |
| $q_e$ (mg g <sup>-1</sup> )                   | 80.51 ± 3.443                     | 75.59 ± 0.1170      |
| $R^2_{ajd.}$                                  | 0.9470                            | -                   |
| $\chi^2$                                      | 0.3202                            | -                   |

**Pseudo-first-order model:**

*Nonlinear Curve Fit (BoxLucas1) (05/05/2020 09:02:05)*

**Parameters**

|    |   | Value    | Standard Error |
|----|---|----------|----------------|
| qt | a | 75.79348 | 1.69616        |
|    | b | 0.15062  | 0.01721        |

Reduced Chi-sqr = 15.3064025454  
 COD(R^2) = 0.98111454193452  
 Iterations Performed = 1  
 Total Iterations in Session = 1  
 Fit converged. Chi-Sqr tolerance value of 1E-9 was reached.

**Statistics**

|                         | qt             |
|-------------------------|----------------|
| Number of Points        | 9              |
| Degrees of Freedom      | 7              |
| Reduced Chi-Sqr         | 15.3064        |
| Residual Sum of Squares | 107.14482      |
| Adj. R-Square           | 0.97842        |
| Fit Status              | Succeeded(100) |

**Pseudo-second-order model:**

*Nonlinear Curve Fit (RectHyperbola) (05/05/2020 09:03:29)*

**Parameters**

|    |   | Value    | Standard Error |
|----|---|----------|----------------|
| qt | a | 80.51322 | 3.4428         |
|    | b | 0.24205  | 0.06781        |

Reduced Chi-sqr = 37.5921857066  
 COD(R^2) = 0.95361773319078  
 Iterations Performed = 1  
 Total Iterations in Session = 1  
 Fit converged. Chi-Sqr tolerance value of 1E-9 was reached.

**Statistics**

|                         | qt             |
|-------------------------|----------------|
| Number of Points        | 9              |
| Degrees of Freedom      | 7              |
| Reduced Chi-Sqr         | 37.59219       |
| Residual Sum of Squares | 263.1453       |
| Adj. R-Square           | 0.94699        |
| Fit Status              | Succeeded(100) |

## Other kinetic models:

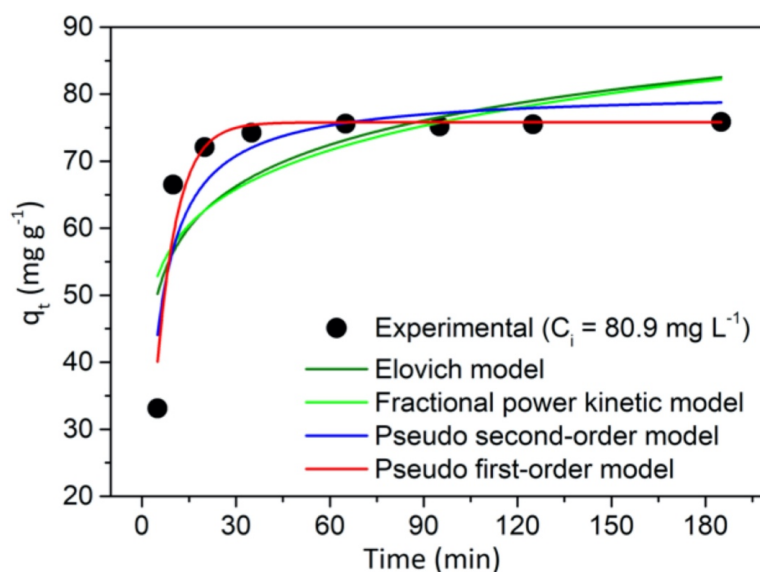

Fig. S5 Models kinetics plot for the removal of BPA by MSN-CTAB. (adsorbent mass 1.0 g L<sup>-1</sup>).

Table S4. Kinetic parameters of BPA adsorption on MSN-CTAB.

| Pseudo-first-order                               | Calculated                    |
|--------------------------------------------------|-------------------------------|
| $k_f$ (min <sup>-1</sup> )                       | 0.1506 ± 0.0185               |
| $q_e$ (mg g <sup>-1</sup> )                      | 75.79 ± 1.832                 |
| $R^2_{ajd.}$                                     | 0.9167                        |
| Pseudo-second-order                              | Calculated                    |
| $k_s$ (g mg <sup>-1</sup> min <sup>-1</sup> )    | 3 × 10 <sup>-3</sup> ± 0.0010 |
| $q_e$ (mg g <sup>-1</sup> )                      | 80.51 ± 3.717                 |
| $R^2_{ajd.}$                                     | 0.7955                        |
| Elovich                                          | Calculated                    |
| $\alpha$ (mg g <sup>-1</sup> min <sup>-1</sup> ) | 6.144 ± 17.75                 |
| $\beta$ (mg g <sup>-1</sup> )                    | 8.942 ± 2.948                 |
| $R^2_{ajd.}$                                     | 0.5396                        |
| Fractional power                                 | Calculated                    |
| $V$ (min <sup>-1</sup> )                         | 0.1224 ± 0.0489               |
| $K$ (mg g <sup>-1</sup> )                        | 43.38 ± 8.777                 |
| $R^2_{ajd.}$                                     | 0.4784                        |

**Pseudo-first-order model:**

*Nonlinear Curve Fit (BoxLucas1) (25/06/2020 13:40:47)*

**Parameters**

|    |   | Value    | Standard Error |
|----|---|----------|----------------|
| qt | a | 75.79348 | 1.83207        |
|    | b | 0.15062  | 0.01859        |

Reduced Chi-sqr = 17.8574696362

COD(R<sup>2</sup>) = 0.92862152884418

Iterations Performed = 1

Total Iterations in Session = 1

Fit converged. Chi-Sqr tolerance value of 1E-9 was reached.

**Statistics**

|                         | qt             |
|-------------------------|----------------|
| Number of Points        | 8              |
| Degrees of Freedom      | 6              |
| Reduced Chi-Sqr         | 17.85747       |
| Residual Sum of Squares | 107.14482      |
| Adj. R-Square           | 0.91673        |
| Fit Status              | Succeeded(100) |

**Pseudo-second-order model:**

*Nonlinear Curve Fit (pseudo2ordem (User)) (25/06/2020 13:34:03)*

**Parameters**

|    |    | Value    | Standard Error |
|----|----|----------|----------------|
| qt | k  | 0.00301  | 0.00101        |
|    | qe | 80.51307 | 3.71701        |

Reduced Chi-sqr = 43.8575500057

COD(R<sup>2</sup>) = 0.82469605538643

Iterations Performed = 1

Total Iterations in Session = 1

Fit converged. Chi-Sqr tolerance value of 1E-9 was reached.

**Statistics**

|                         | qt             |
|-------------------------|----------------|
| Number of Points        | 8              |
| Degrees of Freedom      | 6              |
| Reduced Chi-Sqr         | 43.85755       |
| Residual Sum of Squares | 263.1453       |
| Adj. R-Square           | 0.79548        |
| Fit Status              | Succeeded(100) |

**Elovich model:**

*Nonlinear Curve Fit (Elovich (User)) (24/06/2020 16:48:43)*

**Parameters**

|    |   | Value   | Standard Error |
|----|---|---------|----------------|
| qt | a | 6.14403 | 17.75619       |
|    | b | 8.94257 | 2.94779        |

Reduced Chi-sqr = 98.7352817162

COD(R<sup>2</sup>) = 0.60534310842408

Iterations Performed = 1

Total Iterations in Session = 1

Fit converged. Chi-Sqr tolerance value of 1E-9 was reached.

**Statistics**

|                         | qt             |
|-------------------------|----------------|
| Number of Points        | 8              |
| Degrees of Freedom      | 6              |
| Reduced Chi-Sqr         | 98.73528       |
| Residual Sum of Squares | 592.41169      |
| Adj. R-Square           | 0.53957        |
| Fit Status              | Succeeded(100) |

**Fractional power kinetic model:**

*Nonlinear Curve Fit (FractionalPower (User)) (24/06/2020 16:58:44)*

**Parameters**

|    |   | Value    | Standard Error |
|----|---|----------|----------------|
| qt | K | 43.38569 | 8.77778        |
|    | v | 0.12242  | 0.04894        |

Reduced Chi-sqr = 111.854711937

COD(R<sup>2</sup>) = 0.55290315524766

Iterations Performed = 1

Total Iterations in Session = 1

Fit converged. Chi-Sqr tolerance value of 1E-9 was reached.

**Statistics**

|                         | qt             |
|-------------------------|----------------|
| Number of Points        | 8              |
| Degrees of Freedom      | 6              |
| Reduced Chi-Sqr         | 111.85471      |
| Residual Sum of Squares | 671.12827      |
| Adj. R-Square           | 0.47839        |
| Fit Status              | Succeeded(100) |

## Thermogravimetric Analysis

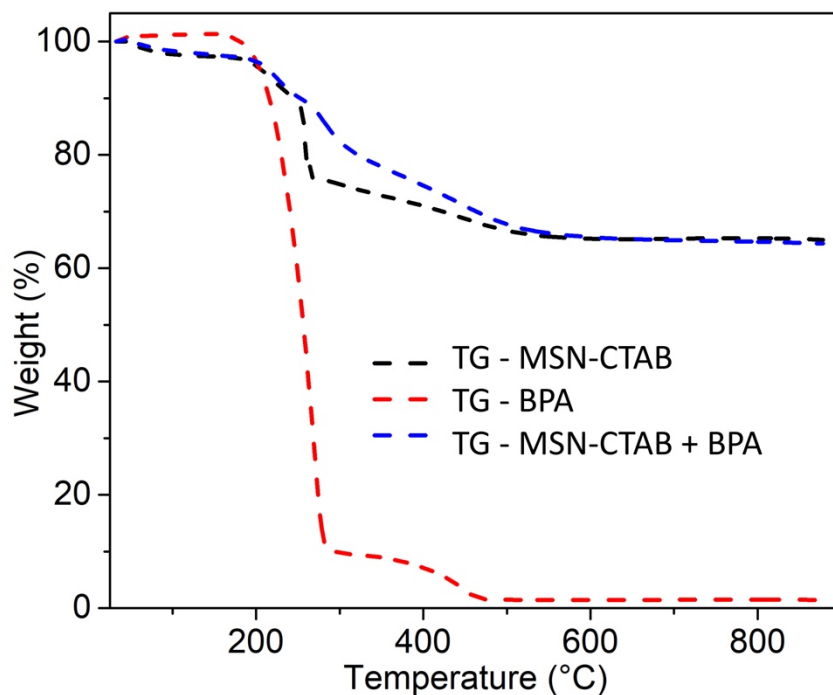

**Fig. S6** TG curves of MSN-CTAB, BPA and MSN-CTAB + BPA.

**Table S5.** Thermogravimetric analysis of MSN-CTAB, BPA and MSN-CTAB after BPA adsorption.

| Samples        | 1 <sup>st</sup> wt. loss (%) | 2 <sup>nd</sup> wt. loss (%) | 3 <sup>rd</sup> wt. loss (%) | 4 <sup>th</sup> wt. loss (%) | Residue (%) |
|----------------|------------------------------|------------------------------|------------------------------|------------------------------|-------------|
| MSN-CTAB       | (25-120 °C)<br>2.05          | (120-235 °C)<br>7.85         | (235-274 °C)<br>14.22        | (274-550 °C)<br>10.54        | 65.34       |
| BPA            | (25-155 °C)<br>2.53          | (155-300 °C)<br>87.87        |                              | (300-470 °C)<br>8.60         | 1.00        |
| MSN-CTAB + BPA | (25-120 °C)<br>2.57          | (120-250 °C)<br>8.71         | (250-337 °C)<br>9.97         | (337-550 °C)<br>13.19        | 65.56       |

## Isotherm Study

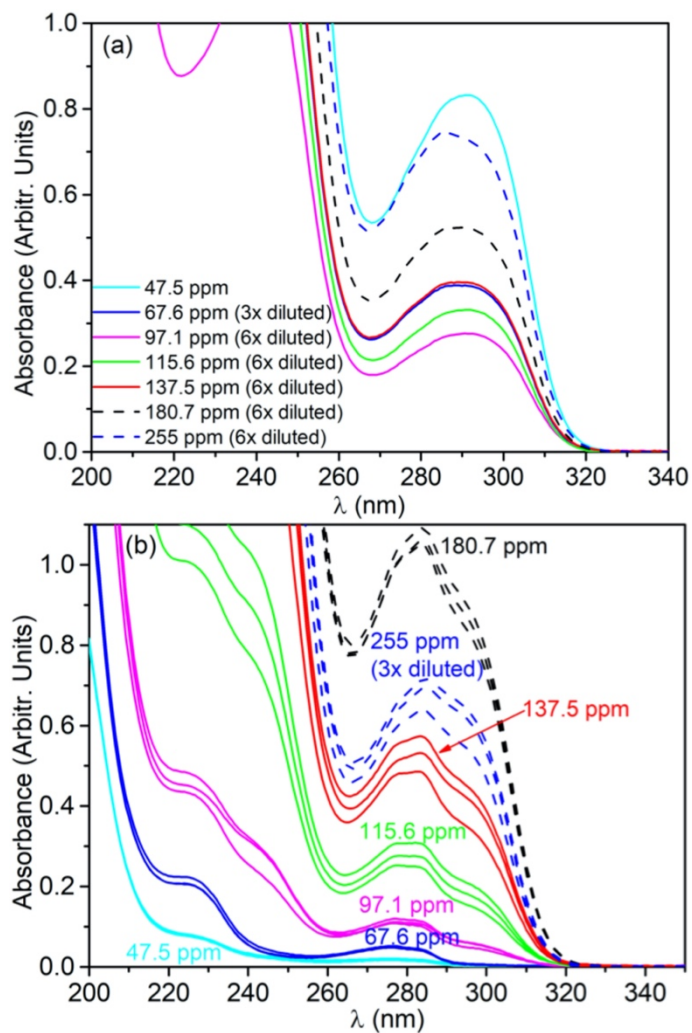

**Fig. S7** UV spectra before BPA adsorption (a) initial solutions at pH 11 and concentrations from 47.5 to 255 mg L<sup>-1</sup>; and after BPA adsorption at equilibrium time 1 h (b) 25°C isotherm. Samples in triplicate.



**Table S6.** Effect of the initial concentration on the adsorption capacity of BPA in pH 11.

| Initial Concentration (mg L <sup>-1</sup> ) | Final pH | C <sub>e</sub> (mg L <sup>-1</sup> ) | q <sub>e</sub> experimental (mg g <sup>-1</sup> ) |
|---------------------------------------------|----------|--------------------------------------|---------------------------------------------------|
| 0                                           | 0        | 0                                    | 0                                                 |
| 47.5                                        | 9.4      | 1.70 ± 0.1622                        | 45.32 ± 0.8607                                    |
| 67.6                                        | 9.1      | 3.43 ± 0.0973                        | 63.32 ± 0.8792                                    |
| 97.1                                        | 10       | 6.98 ± 0.2883                        | 88.63 ± 1.053                                     |
| 115.6                                       | 10.3     | 16.33 ± 1.578                        | 97.98 ± 1.145                                     |
| 137.5                                       | 10.4     | 30.45 ± 2.418                        | 106.01 ± 1.345                                    |
| 180.7                                       | 10.7     | 60.56 ± 1.161                        | 120.11 ± 1.161                                    |
| 255                                         | 10.8     | 117.01 ± 6.992                       | 136.16 ± 6.137                                    |

**Table S7.** Isotherm parameters of BPA adsorption on MSN-CTAB.

| <b>Langmuir</b>                                                               |               |
|-------------------------------------------------------------------------------|---------------|
| $Q_{max}$ (mg g <sup>-1</sup> )                                               | 128.19        |
| $K_L$ (L mg <sup>-1</sup> )                                                   | 0.2829        |
| $R^2_{ajd.}$                                                                  | 0.9746        |
| Reduced Chi-squared                                                           | 49.526        |
| <b>Freundlich</b>                                                             |               |
| $K_F$ (mg g <sup>-1</sup> (mg L <sup>-1</sup> ) <sup>-1/n<sub>F</sub></sup> ) | 51.159        |
| $n_F$                                                                         | 4.7451        |
| $R^2_{ajd.}$                                                                  | 0.9716        |
| Reduced Chi-squared                                                           | 55.489        |
| <b>Liu</b>                                                                    |               |
| $Q_{max}$ (mg g <sup>-1</sup> )                                               | <b>155.78</b> |
| $K_g$ (L mg <sup>-1</sup> )                                                   | 0.1567        |
| $n_L$                                                                         | 0.5873        |
| $R^2_{ajd.}$                                                                  | <b>0.9851</b> |
| Reduced Chi-squared                                                           | 29.045        |

$Q_{max}$ : maximum amount adsorbed;  $K_L$ : Langmuir equilibrium constant;  $R^2_{ajd.}$ : adjusted coefficient of determination;  $K_F$ : Freundlich equilibrium constant;  $n_F$ : dimensionless exponent of the Freundlich equation;  $K_g$ : Liu equilibrium constant;  $n_L$ : dimensionless exponent of the Liu equation.

## References

- 1 S. Lagergren, *K. Sven. Vetensk. Handl.*, 1898, **24**, 1-39.
- 2 Y. S. Ho and G. McKay, *Chem. Eng. J.*, 1998, **70**, 115-124.
- 3 G. Blanchard, M. Maunaye and G. Martin, *Water Res.*, 1984, **18**, 1501-1507.
- 4 Y.-S. Ho, Doctorates > Ph.D., University of Birmingham, 1995.
- 5 Y. S. Ho, D. A. J. Wase and C. F. Forster, *Environ. Technol.*, 1996, **17**, 71-77.
- 6 Y.-S. Ho, *J. Hazard. Mater.*, 2006, **136**, 681-689.
- 7 Y.-S. Ho, *Environ. Sci. Pollut. Res.*, 2014, **21**, 7234-7235.
- 8 É. C. Lima, M. A. Adebayo and F. M. Machado, in *Carbon Nanomaterials as Adsorbents for Environmental and Biological Applications*, eds. C. P. Bergmann and F. M. Machado, Springer International Publishing, 1 edn., 2015, DOI: 10.1007/978-3-319-18875-1, ch. 3, pp. 33-69.
- 9 A. A. Inyinbor, F. A. Adekola and G. A. Olatunji, *Water Resour. Ind.*, 2016, **15**, 14-27.
- 10 I. Langmuir, *J. Am. Chem. Soc.*, 1918, **40**, 1361-1403.
- 11 H. M. F. Freundlich, *J. Phys. Chem.*, 1906, **57**, 385-471.
- 12 R. J. Alessio, X. Li and D. F. Martin, *J. Environ. Sci. Health A Tox. Hazard Subst. Environ. Eng.*, 2012, **47**, 2198-2204.
